# Supplementary material
Source: PubMed Central journal article supplement (PMC4676576)
Supplement: NIHMS688933-supplement-304494R2_Figure_Reprint_Permissions.pdf [file NIHMS688933-supplement-304494R2_Figure_Reprint_Permissions.pdf]

## Circulation Research

---

**From:** Yingxin Li <yli01@stanford.edu>  
**Sent:** Wednesday, May 06, 2015 1:52 AM  
**To:** circulation research <circulation.research>  
**Cc:** Joe Wu; Karim Sallam  
**Subject:** RE: CIRCRES/2014/304494R2: Reprint Permission of Compendium: Tissue and Animal Models of Sudden Cardiac Death

Dear Gemma Bridges-Lyman,

As for figures 2 and 3 in our review, I modified a lot on top of the original figures and cited the corresponding references. I have asked the publishers about the reprint permissions. As they answered (copied below), the permissions are automatically granted. Please feel free to let us know if further action is needed. Thanks.

Sincerely,  
Yingxin

---

Yingxin Li, Ph.D.  
Post-doctoral Fellow  
Stanford University School of Medicine  
Lorrey I. Lokey Stem Cell Research Building, Room G1105  
265 Campus Drive, Stanford, CA 94305-5454  
Email: yli01@stanford.edu

----- Forwarded Message -----

From: "Permissions Helpdesk" <permissionshelpdesk@elsevier.com>  
To: yli01@stanford.edu  
Sent: Tuesday, May 5, 2015 8:27:40 AM  
Subject: RE: Elsevier.com permissions query

Dear Dr. Li,

Your permission request falls within the STM signatory guidelines, found here: <http://www.stm-assoc.org/permissions-guidelines/> .

Permission is automatically granted. Please be sure to acknowledge the original source of the Elsevier material.

If you have any additional questions, feel free to contact us.

Thank you,  
Laura

Laura Stingelin  
Permissions Helpdesk Associate  
Elsevier  
1600 John F. Kennedy Boulevard  
Suite 1800  
Philadelphia, PA 19103-2899  
T: (215) 239-3867  
F: (215) 239-3805

E: [l.stingelin@elsevier.com](mailto:l.stingelin@elsevier.com)<<mailto:h.wechsler@elsevier.com>>

Questions about obtaining permission: whom to contact? What rights to request?

When is permission required? Contact the Permissions Helpdesk at:

[[cid:image002.jpg@01CD3A58.11B52670](#)] +1-800-523-4069 x 3808 [[cid:image003.jpg@01CD3A58.11B52670](#)]  
[permissionshelpdesk@elsevier.com](mailto:permissionshelpdesk@elsevier.com)<<mailto:permissionshelpdesk@elsevier.com>>

.....  
Customer By Web Form - 04/05/2015 05.52 PM

Dear Editors,

This is Yingxin Li, PhD from Stanford University. We wrote a review article which cited a figure from Current Opinion in Pharmacology and would request for Reprint Permission to adapt Figure 1 at Page 17 from Cardiac Safety Assays. Heijman J, Voigt N, Carlsson LG, Dobrev D. 2014;15:16-21.

The information of my article is as follows.

Finding the Rhythm of Sudden Cardiac Death: New Opportunities Using Induced Pluripotent Stem Cell-Derived Cardiomyocytes. Karim Sallam, MD, Yingxin Li, PhD, Philip T. Sager, MD, Steven R. Houser, PhD, Joseph C. Wu, MD, PhD. This material will appear in Circulation Research. The tentative publication date is June, 2015. This request is for worldwide rights in English for this and any subsequent editions of this publication.

Thanks in advance.

Sincerely,  
Yingxin Li

---  
Yingxin Li, Ph.D.  
Post-doctoral Fellow  
Stanford University School of Medicine

Lorrey I. Lokey Stem Cell Research Building, Room G1105  
265 Campus Drive, Stanford, CA 94305-5454  
Email: yli01@stanford.edu<mailto:yli01@stanford.edu>

.....

----- Forwarded Message -----

From: "Frontiers in Physiology Editorial Office" <physiology.editorial.office@frontiersin.org>  
To: "Yingxin Li" <yli01@stanford.edu>  
Cc: "Karim Sallam" <sallam@stanford.edu>  
Sent: Tuesday, May 5, 2015 2:48:32 AM  
Subject: Re: Request for Reprint Permission from Yingxin Li at Stanford University

Dear Dr Li,

Thanks for your message.

All Frontiers articles are published under the CC-BY creative commons licensing framework, and therefore, do not require permissions for reprints in normal circumstances - <https://creativecommons.org/licenses/by/4.0/>.

In these cases, we would ask that, as a matter of courtesy, you inform the authors.

However, in cases where a third party copyright (non CC-BY, for example) is in play over the figure, it will be necessary from you to request permission from the original copyright holder for the reprint.

Let me know if you have any further questions at your convenience.

Best wishes,

Brian Boyle <<http://loop.frontiersin.org/people/131343/overview>>  
Journal Operations Specialist

On behalf of -

Nina Rothe <<http://loop.frontiersin.org/people/96371/overview>>, PhD Journal Manager Frontiers | Physiology Editorial Office EPFL - Innovation Park, building I  
1015 Lausanne, Switzerland | T +41(0)21 510 17 34 [www.frontiersin.org](http://www.frontiersin.org) | [twitter.com/FrontiersIn](https://twitter.com/FrontiersIn)  
<<http://twitter.com/frontiersin>>

\*For technical issues, please contact our IT Helpdesk - [\\*\\*support@frontiersin.org](mailto:support@frontiersin.org)  
<[support@frontiersin.org](mailto:support@frontiersin.org)>\*

On Mon, May 4, 2015 at 8:01 PM, Yingxin Li <yli01@stanford.edu> wrote:

> Dear Editors,

>  
> This is Yingxin Li, PhD from Stanford University. We wrote a review  
> article which cited a figure from Frontiers in Physiology and would  
> request for Reprint Permission to adapt Figure 1 at Page 4 from  
> Induced Pluripotent Stem Cell Derived Cardiomyocytes as Models for Cardiac Arrhythmias.  
> Hoekstra M, Mummery CL, Wilde AA, Bezzina CR, Verkerk AO. 2012;3:346.  
>  
> The information of our article is as follows.  
>  
> Finding the Rhythm of Sudden Cardiac Death: New Opportunities Using  
> Induced Pluripotent Stem Cell-Derived Cardiomyocytes. Karim Sallam,  
> MD, Yingxin Li, PhD, Philip T. Sager, MD, Steven R. Houser, PhD,  
> Joseph C. Wu, MD, PhD. This material will appear in Circulation  
> Research. The tentative publication date is June, 2015. This request  
> is for worldwide rights in English for this and any subsequent editions of this publication.  
>  
>  
> Thanks in advance.  
>  
> Sincerely,  
> Yingxin Li  
>  
> ---  
> Yingxin Li, Ph.D.  
> Post-doctoral Fellow  
> Stanford University School of Medicine Lorrey I. Lokey Stem Cell  
> Research Building, Room G1105  
> 265 Campus Drive, Stanford, CA 94305-5454  
> Email: yli01@stanford.edu  
>  
>

----- Forwarded Message -----

From: "circulation research" <circulation.research@circresearch.com>  
To: sallam@stanford.edu  
Cc: "circulation research" <circulation.research@circresearch.com>  
Sent: Tuesday, April 28, 2015 9:07:45 AM  
Subject: Circulation Research Invited Review Article

April 28, 2015

RE: CIRCRES/2014/304494R2: Compendium: Tissue and Animal Models of Sudden Cardiac Death

Dear Dr. Sallam:

I am writing to confirm that we have finalized and prepared your above Invited Review article for publication in the JUNE 5, 2015 issue of Circulation Research.

As your manuscript was accepted some time ago, we would like to give you the opportunity to review the final Word file before sending the manuscript to the publisher. If you need to update or edit that manuscript, please do so and return by MONDAY, MAY 4.

In addition, if you have not already done so, please submit figure reprint permissions for figures 2 and 3.

Thank you for contributing to Circulation Research.

Sincerely,

Gemma Bridges-Lyman  
Asst. Managing Editor  
Circulation Research, Journal of the American Heart Association
